# Supplementary material for: Pressure-driven phase transitions and reduction of dimensionality in 2D silicon nanosheets
Source: PubMed Central journal article supplement (PMC6303324; doi:10.1038/s41467-018-07832-4), 2018-12-21
Supplement: 41467_2018_7832_MOESM1_ESM.pdf [file 41467_2018_7832_MOESM1_ESM.pdf]

# Supplementary Information

## **Pressure-Driven Phase Transitions and Reduction of Dimensionality in 2D Silicon Nanosheets**

Gil Chan Hwang<sup>1</sup>, Douglas A. Blom<sup>2</sup>, Thomas Vogt<sup>3</sup>, Jaejun Lee<sup>4</sup>, Heon-Jin Choi<sup>4</sup>,  
Sen Shao<sup>5</sup>, Yanming Ma<sup>5,6</sup>, Yongjae Lee<sup>1,7,\*</sup>

<sup>1</sup>Department of Earth System Sciences, Yonsei University, Seoul 03722, Korea

<sup>2</sup>NanoCenter & Department of Chemical Engineering, University of South Carolina, Columbia, SC 29208, USA

<sup>3</sup>NanoCenter & Department of Chemistry & Biochemistry, University of South Carolina, Columbia, SC 29208, USA

<sup>4</sup>Department of Materials Science and Engineering, Yonsei University, Seoul 03722, Korea

<sup>5</sup>State Key Lab of Superhard Materials & Innovation Center for Computational Physics Methods and softwares, College of Physics, Jilin University, 130012 Changchun, China

<sup>6</sup>International Center of Future Science, Jilin University, 130012 Changchun, China

<sup>7</sup>Center for High Pressure Science and Technology Advanced Research, 201203 Shanghai, China

\*Corresponding author: yongjaelee@yonsei.ac.kr (Y. L.)

### **This PDF file includes:**

Supplementary Figures 1 to 4  
Supplementary Tables 1 to 3

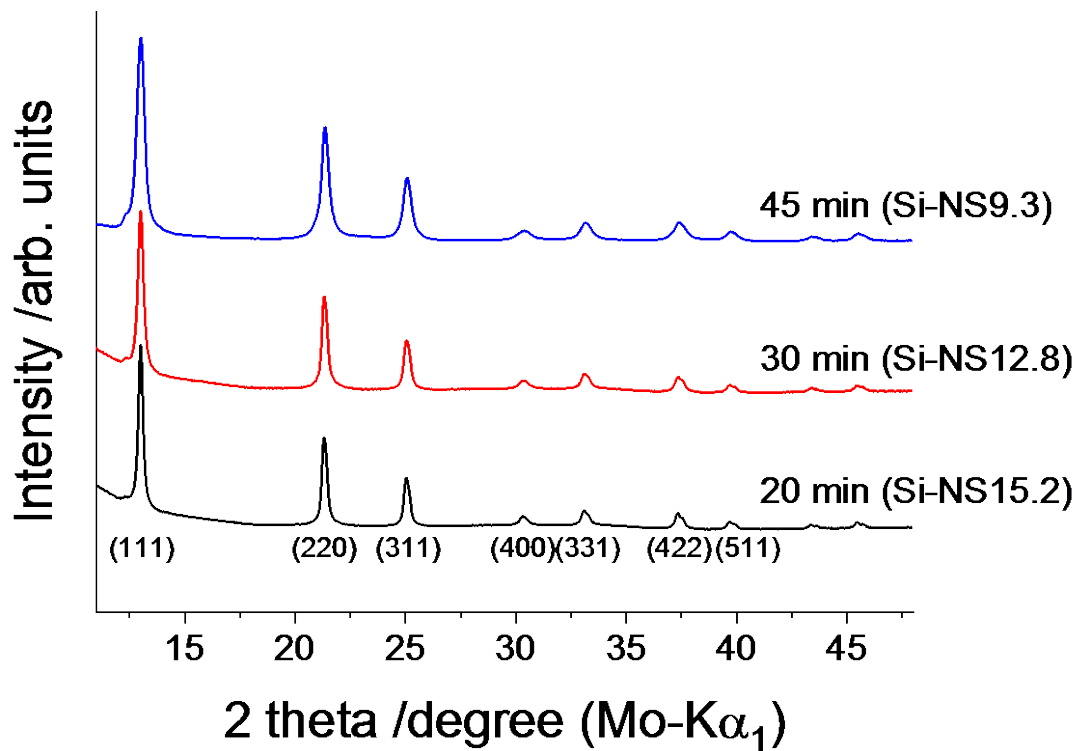

Supplementary Figure 1. X-ray diffraction patterns of Si-NSs at ambient conditions using powder samples inside quartz capillaries (Ø0.5 mm) using Mo-Kα<sub>1</sub> radiation.

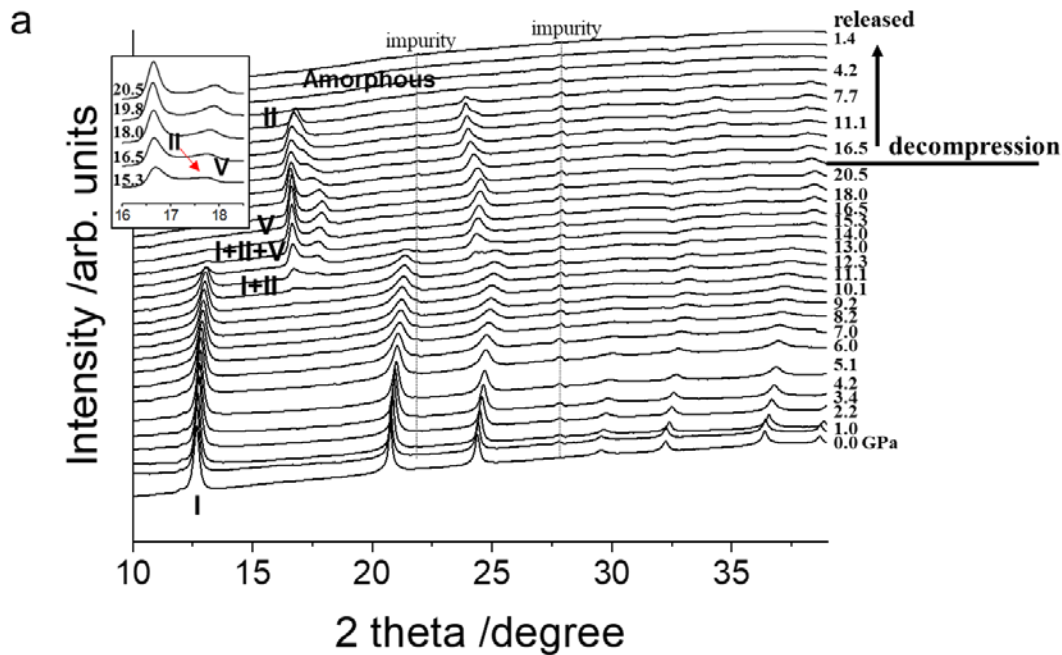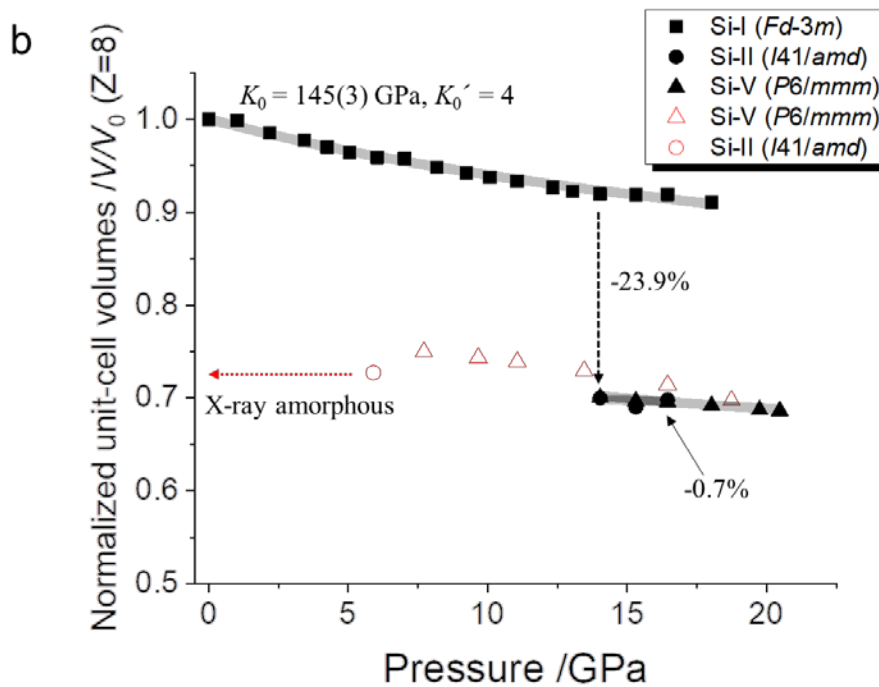

Supplementary Figure 2. **a**, High-pressure X-ray diffraction for Si-NS9.3 subjected to compression and decompression. **b**, Normalized unit cell volumes of phases observed during compression and decompression of Si-NS9.3. X-ray amorphous phases appear after 5.90(10) GPa during compression for Si-NS9.3. The volume was normalized to  $Z = 8$ .

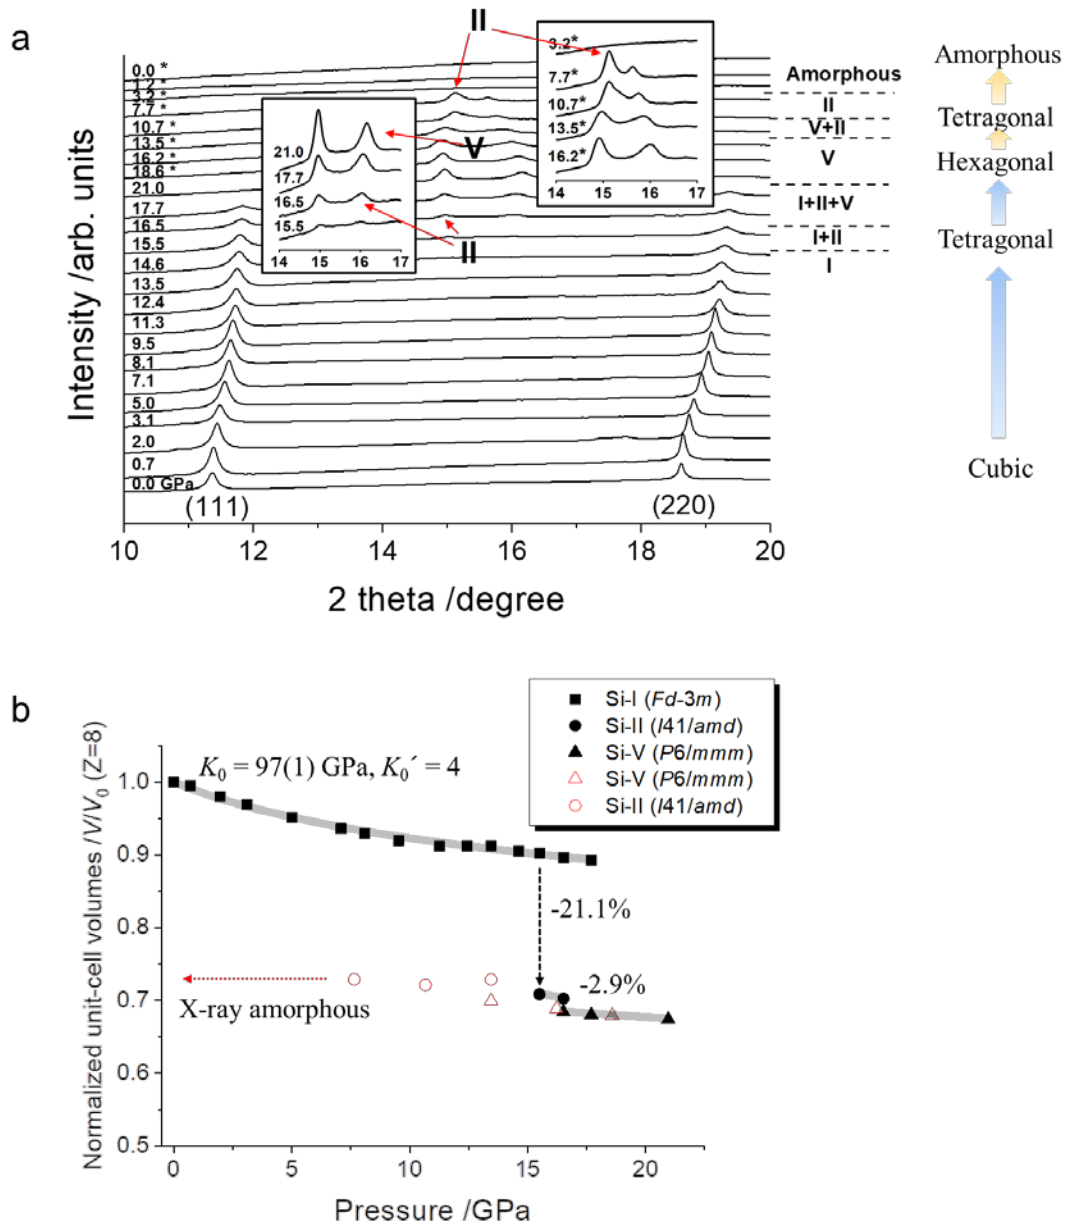

Supplementary Figure 3. **a**, High-pressure X-ray diffraction of Si-NS12.8 subjected to compression and decompression (\*). Inset images highlight phase transition region to Si-II and Si-V. **b**, Normalized unit cell volumes of phases observed during compression and decompression cycle of Si-NS12.8. X-ray amorphous phases appear below 7.65(10) GPa during decompression for Si-NS12.8. Unit cell volume was normalized to  $Z = 8$ .

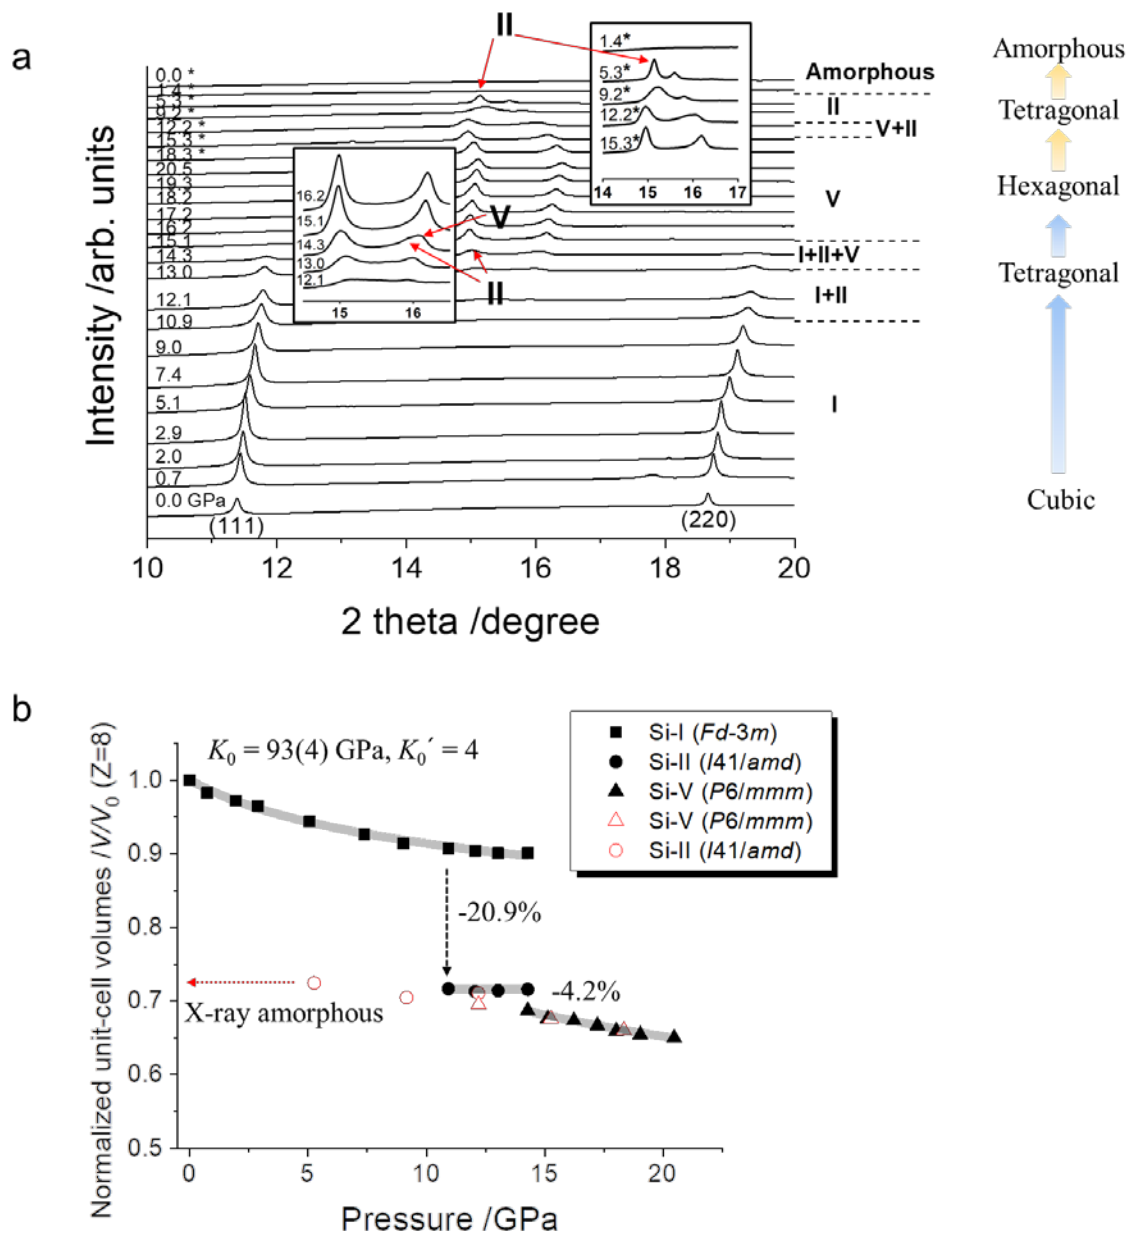

Supplementary Figure 4. **a**, High-pressure X-ray diffraction of Si-NS15.2 during compression and decompression (\*). Inset images highlight phase transition regions to Si-II and Si-V. **b**, Normalized unit cell volumes of phases observed during compression and decompression of Si-NS15.2. X-ray amorphous phases appear below 5.26(10) GPa during decompression for Si-NS15.2. Each volume was normalized to  $Z = 8$ .

Supplementary Table 1. Parameters of Si-NSs and X-ray conditions under ambient conditions

|                                      | Si-NS9.3  | Si-NS12.8                                     | Si-NS15.2 |
|--------------------------------------|-----------|-----------------------------------------------|-----------|
| Composition                          |           | Si                                            |           |
| X-ray radiation                      |           | Mo-K $\alpha_1$ ( $\lambda = 0.070932(1)$ nm) |           |
| Crystal system                       |           | <i>Cubic (diamond structure)</i>              |           |
| Space group                          |           | <i>Fd<math>\bar{3}m</math></i>                |           |
| <i>a</i> /nm                         | 0.5435(1) | 0.5429(1)                                     | 0.5411(1) |
| <i>V</i> /nm <sup>3</sup>            | 0.1606(1) | 0.1600(1)                                     | 0.1584(1) |
| <i>FWHM</i> (111)                    | 0.4030(1) | 0.2943(1)                                     | 0.2475(1) |
| Average crystallite size /nm*, (111) | 9.3(7)    | 12.8(8)                                       | 15.2(4)   |
| Density (X-ray) /gm/cm <sup>3</sup>  | 4.647     | 4.663                                         | 4.710     |
| CVD time                             | 45 min    | 30 min                                        | 20 min    |
| Reference                            |           | 1                                             |           |

\* Crystallite size was calculated using Scherrer equation  $D_{(111)} = 0.94\lambda/\beta \cos\theta^2$

Supplementary Table 2. Bulk moduli ( $K_0$ ) and lattice parameters of Si-NSs

| P /GPa           | $a$ /nm                                                  | $c$ /nm   | $c/a$     | $V$ /nm <sup>3</sup> | $V/V_0$ | $V/V_0$ (Z=8) | Phase              |
|------------------|----------------------------------------------------------|-----------|-----------|----------------------|---------|---------------|--------------------|
| <b>Si-NS9.3</b>  | I (0 - 18.0 GPa); $K_0 = 145(3)$ GPa, $K_0' = 4$ (fixed) |           |           |                      |         |               |                    |
| 0.00<br>(in DAC) | 0.5435(1)                                                |           |           | 0.1605(1)            | 1.0000  |               | I                  |
| 1.01             | 0.5432(1)                                                |           |           | 0.1603(1)            | 0.9987  |               | I                  |
| 2.18             | 0.5408(1)                                                |           |           | 0.1582(1)            | 0.9854  |               | I                  |
| 3.42             | 0.5393(1)                                                |           |           | 0.1569(1)            | 0.9773  |               | I                  |
| 4.24             | 0.5380(1)                                                |           |           | 0.1557(1)            | 0.9700  |               | I                  |
| 5.05             | 0.5369(1)                                                |           |           | 0.1548(1)            | 0.9644  |               | I                  |
| 6.04             | 0.5359(1)                                                |           |           | 0.1539(1)            | 0.9587  |               | I                  |
| 7.01             | 0.5357(1)                                                |           |           | 0.1537(1)            | 0.9577  |               | I                  |
| 8.17             | 0.5339(1)                                                |           |           | 0.1522(1)            | 0.9482  |               | I                  |
| 9.24             | 0.5328(1)                                                |           |           | 0.1513(1)            | 0.9422  |               | I                  |
| 10.08            | 0.5319(1)                                                |           |           | 0.1505(1)            | 0.9377  |               | I                  |
| 11.06            | 0.5311(1)                                                |           |           | 0.1498(1)            | 0.9334  |               | I                  |
| 12.33            | 0.5298(1)                                                |           |           | 0.1487(1)            | 0.9265  |               | I                  |
| 13.04            | 0.5290(1)                                                |           |           | 0.1481(1)            | 0.9224  |               | I                  |
|                  | **                                                       |           |           | **                   | **      | **            | II                 |
| 14.03            | 0.5285(1)                                                |           |           | 0.1476(1)            | 0.9195  |               | I                  |
|                  | 0.4653(1)                                                | 0.2595(5) | 0.5576(5) | 0.0562(1)            | 1.0000  | 0.6999        | II                 |
|                  | 0.2609(1)                                                | 0.2384(1) | 0.9139(1) | 0.0141(1)            | 1.0000  | 0.7003        | V                  |
| 15.31            | 0.5283(1)                                                |           |           | 0.1475(1)            | 0.9188  |               | I                  |
|                  | 0.4644(1)                                                | 0.2569(1) | 0.5533(1) | 0.0554(2)            | 0.9862  | 0.6902        | II                 |
|                  | 0.2612(1)                                                | 0.2365(1) | 0.9054(1) | 0.0140(1)            | 0.9948  | 0.6967        | V                  |
| 16.45            | 0.5283(6)                                                |           |           | 0.1475(5)            | 0.9188  |               | I                  |
|                  | 0.4666(1)                                                | 0.2569(1) | 0.5513(1) | 0.0560(10)           | 0.9972  | 0.6979        | II                 |
|                  | 0.2597(1)                                                | 0.2390(1) | 0.9206(1) | 0.0140(1)            | 0.9932  | 0.6956        | V                  |
| 18.03            | 0.5268(6)                                                |           |           | 0.1462(5)            | 0.9106  |               | I                  |
|                  | 0.2590(1)                                                | 0.2389(1) | 0.9266(1) | 0.0139(1)            | 0.9878  | 0.6918        | V                  |
| 19.75            | 0.2579(1)                                                | 0.2393(1) | 0.9278(1) | 0.0138(1)            | 0.9811  | 0.6871        | V                  |
| 20.47            | 0.2577(1)                                                | 0.2393(1) | 0.9285(1) | 0.0138(1)            | 0.9796  | 0.6861        | V                  |
| 18.74 *          | 0.2595(1)                                                | 0.2398(1) | 0.9239(1) | 0.0140(1)            | 0.9954  | 0.6972        | V                  |
| 16.45 *          | 0.2631(1)                                                | 0.2390(1) | 0.9085(1) | 0.0143(1)            | 1.0197  | 0.7141        | V                  |
| 13.46 *          | 0.2657(1)                                                | 0.2393(1) | 0.9007(1) | 0.0146(1)            | 1.0522  | 0.7390        | V                  |
| 11.06 *          | 0.2675(1)                                                | 0.2392(1) | 0.8943(1) | 0.0148(1)            | 1.0552  | 0.7390        | V                  |
| 9.66 *           | 0.2683(1)                                                | 0.2392(1) | 0.8913(1) | 0.0149(1)            | 1.0614  | 0.7434        | V                  |
| 7.71 *           | 0.2703(1)                                                | 0.2376(1) | 0.8792(1) | 0.0150(1)            | 1.0700  | 0.7493        | V                  |
| 5.90 *           | 0.4738(1)                                                | 0.2560(1) | 0.5487(2) | 0.0584(1)            | 1.0390  | 0.7272        | II                 |
| 4.15 *           |                                                          |           |           |                      |         |               | amorphous          |
| 2.59 *           |                                                          |           |           |                      |         |               | amorphous          |
| 1.36 *           |                                                          |           |           |                      |         |               | amorphous          |
| 0.00 *           |                                                          |           |           |                      |         |               | amorphous          |
| <b>Si-NS12.8</b> | I (0 - 17.7 GPa); $K_0 = 97(1)$ GPa, $K_0' = 4$ (fixed)  |           |           |                      |         |               |                    |
| 0.00<br>(in DAC) | 0.5430(1)                                                |           |           | 0.1601(1)            | 1.0000  |               | I ( $Fd\bar{3}m$ ) |
| 0.70             | 0.5422(1)                                                |           |           | 0.1594(1)            | 0.9954  |               | I                  |
| 1.97             | 0.5395(1)                                                |           |           | 0.1570(1)            | 0.9804  |               | I                  |
| 3.10             | 0.5374(1)                                                |           |           | 0.1552(1)            | 0.9694  |               | I                  |
| 5.01             | 0.5341(1)                                                |           |           | 0.1524(1)            | 0.9517  |               | I                  |
| 7.09             | 0.5312(1)                                                |           |           | 0.1499(1)            | 0.9360  |               | I                  |
| 8.09             | 0.5298(1)                                                |           |           | 0.1487(1)            | 0.9291  |               | I                  |
| 9.53             | 0.5281(1)                                                |           |           | 0.1473(4)            | 0.9199  |               | I                  |
| 11.27            | 0.5266(1)                                                |           |           | 0.1461(1)            | 0.9124  |               | I                  |
| 12.43            | 0.5266(1)                                                |           |           | 0.1460(1)            | 0.9121  |               | I                  |

|                  |                                                         |           |           |           |        |        |                       |
|------------------|---------------------------------------------------------|-----------|-----------|-----------|--------|--------|-----------------------|
| 13.45            | 0.5266(1)                                               |           |           | 0.1460(1) | 0.9121 |        | I                     |
| 14.61            | 0.5253(1)                                               |           |           | 0.1450(1) | 0.9055 |        | I                     |
| 15.50            | 0.5248(2)                                               |           |           | 0.1445(2) | 0.9028 |        | I                     |
|                  | 0.4481(1)                                               | 0.2825(1) | 0.6305(1) | 0.0567(1) | 1.0000 | 0.7086 | II ( <i>I41/amd</i> ) |
| 16.52            | 0.5236(1)                                               |           |           | 0.1435(1) | 0.8965 |        | I                     |
|                  | 0.4463(1)                                               | 0.2823(1) | 0.6325(1) | 0.0562(1) | 0.9914 | 0.7025 | II                    |
|                  | 0.2573(1)                                               | 0.2387(1) | 0.9278(1) | 0.0137(1) | 1.0000 | 0.6840 | V ( <i>P6/mmm</i> )   |
| 17.70            | 0.5228(1)                                               |           |           | 0.1429(1) | 0.8923 |        | I                     |
|                  | 0.2567(1)                                               | 0.2386(1) | 0.9298(1) | 0.0136(1) | 0.9946 | 0.6802 | V                     |
| 20.96            | 0.2554(1)                                               | 0.2388(1) | 0.9352(1) | 0.0135(1) | 0.9856 | 0.6740 | V                     |
| 18.59 *          | 0.2561(1)                                               | 0.2393(1) | 0.9342(1) | 0.0136(1) | 0.9933 | 0.6799 | V                     |
| 16.23 *          | 0.2577(1)                                               | 0.2395(1) | 0.9297(1) | 0.0138(1) | 1.0062 | 0.6882 | V                     |
| 13.45 *          | 0.2602(1)                                               | 0.2386(1) | 0.9170(1) | 0.0140(1) | 1.0218 | 0.6988 | V                     |
|                  | 0.4776(1)                                               | 0.2558(1) |           | 0.0583(1) | 1.0283 | 0.7287 | II                    |
| 10.67 *          | 0.4723(1)                                               | 0.2588(1) |           | 0.0577(1) | 1.0177 | 0.7211 | II                    |
| 7.65 *           | 0.4724(1)                                               | 0.2615(1) |           | 0.0583(1) | 1.0285 | 0.7288 | II                    |
| 3.24 *           |                                                         |           |           |           |        |        | amorphous             |
| 1.22 *           |                                                         |           |           |           |        |        | amorphous             |
| 0.00 *           |                                                         |           |           |           |        |        | amorphous             |
| <b>Si-NS15.2</b> | I (0 - 14.3 GPa); $K_0 = 93(4)$ GPa, $K_0' = 4$ (fixed) |           |           |           |        |        |                       |
| 0.00<br>(in DAC) | 0.5429(1)                                               |           |           | 0.1560(1) | 1.0000 |        | I ( <i>Fd3m</i> )     |
| 0.74             | 0.5398(1)                                               |           |           | 0.1573(1) | 0.9831 |        | I                     |
| 1.95             | 0.5378(1)                                               |           |           | 0.1555(1) | 0.9722 |        | I                     |
| 2.89             | 0.5364(1)                                               |           |           | 0.1543(1) | 0.9648 |        | I                     |
| 5.06             | 0.5325(1)                                               |           |           | 0.1510(1) | 0.9438 |        | I                     |
| 7.38             | 0.5293(1)                                               |           |           | 0.1482(1) | 0.9267 |        | I                     |
| 9.02             | 0.5268(1)                                               |           |           | 0.1462(1) | 0.9141 |        | I                     |
| 10.93            | 0.5255(1)                                               |           |           | 0.1451(1) | 0.9072 |        | I                     |
|                  | 0.4695(6)                                               | 0.2600(4) | 0.5538(6) | 0.0573(2) | 1.0000 | 0.7166 | II ( <i>I41/amd</i> ) |
| 12.06            | 0.5249(2)                                               |           |           | 0.1446(2) | 0.9042 |        | I                     |
|                  | 0.4703(4)                                               | 0.2579(5) | 0.5485(5) | 0.0570(2) | 0.9951 | 0.7131 | II                    |
| 13.03            | 0.5242(9)                                               |           |           | 0.1440(7) | 0.9004 |        | I                     |
|                  | 0.4736(1)                                               | 0.2547(1) | 0.5377(1) | 0.0571(1) | 0.9966 | 0.7142 | II                    |
| 14.28            | 0.5231(1)                                               |           |           | 0.1432(1) | 0.9004 |        | I                     |
|                  | 0.4763(1)                                               | 0.2524(1) | 0.5299(1) | 0.0573(1) | 0.9988 | 0.7158 | II                    |
|                  | 0.2585(2)                                               | 0.2374(2) | 0.9181(2) | 0.0137(1) | 1.0000 | 0.6872 | V ( <i>P6/mmm</i> )   |
| 15.12            | 0.2558(1)                                               | 0.2387(1) | 0.9332(1) | 0.0135(1) | 0.9842 | 0.6763 | V                     |
| 16.23            | 0.2553(1)                                               | 0.2386(1) | 0.9347(1) | 0.0135(1) | 0.9803 | 0.6736 | V                     |
| 17.22            | 0.2543(1)                                               | 0.2382(1) | 0.9368(1) | 0.0133(1) | 0.9708 | 0.6671 | V                     |
| 18.02            | 0.2533(1)                                               | 0.2375(1) | 0.9379(1) | 0.0132(1) | 0.9602 | 0.6598 | V                     |
| 19.03            | 0.2525(1)                                               | 0.2371(1) | 0.9390(1) | 0.0131(1) | 0.9527 | 0.6547 | V                     |
| 20.46            | 0.2518(1)                                               | 0.2367(1) | 0.9401(1) | 0.0130(1) | 0.9461 | 0.6501 | V                     |
| 18.34 *          | 0.2532(1)                                               | 0.2378(1) | 0.9391(1) | 0.0132(1) | 0.9607 | 0.6602 | V                     |
| 15.26 *          | 0.2555(1)                                               | 0.2391(1) | 0.9359(1) | 0.0135(1) | 0.9837 | 0.6760 | V                     |
| 12.20 *          | 0.2592(1)                                               | 0.2389(1) | 0.9215(1) | 0.0139(1) | 1.0114 | 0.6950 | V                     |
|                  | 0.4490(1)                                               | 0.2821(1) | 0.6283(1) | 0.0569(1) | 0.9922 | 0.7110 | II                    |
| 9.16 *           | 0.4529(1)                                               | 0.2748(1) | 0.6069(1) | 0.0564(1) | 0.9834 | 0.7047 | II                    |
| 5.26 *           | 0.4587(1)                                               | 0.2755(1) | 0.6006(1) | 0.0580(1) | 1.0111 | 0.7246 | II                    |
| 1.41 *           |                                                         |           |           |           |        |        | amorphous             |
| 0.00 *           |                                                         |           |           |           |        |        | amorphous             |

\* On release process

Structure references: I<sup>1</sup>, II<sup>3</sup>, V<sup>3</sup>.

\*\* Unit-cell parameter cannot be calculated



Supplementary Table 3. Comparison of bulk modulus with previous studies

| $K_0$ /GPa | $K_0'$ | Pressure range /GPa     | Crystallite type    | Reference                                |
|------------|--------|-------------------------|---------------------|------------------------------------------|
| 100.8      | 4.7    | 0.0 - 4.0               | Bulk                | Vaidya <i>et al.</i> (1972) <sup>4</sup> |
| 97.84(2)   | 4.11   | 0.0 - 8.0               | Bulk                | George (1997) <sup>5</sup>               |
| 99         | 3.2    | <i>ab initio</i> method | Bulk                | Yin and Cohen (1982) <sup>6</sup>        |
| 97.8       | 4.1    | 0.0 - 11                | Bulk                | Pandya <i>et al.</i> (2010) <sup>7</sup> |
| 145(3)     | 4      | 0.0 - 18.0              | Nanosheet (9.3 nm)  | This study (Si-NS9.3)                    |
| 122(7)     | 8(2)   | 0.0 - 18.0              | Nanosheet (9.3 nm)  | This study (Si-NS9.3)                    |
| 97(1)      | 4      | 0.0 - 17.7              | Nanosheet (12.8 nm) | This study (Si-NS12.8)                   |
| 70(8)      | 16(4)  | 0.0 - 17.7              | Nanosheet (12.8 nm) | This study (Si-NS12.8)                   |
| 93(4)      | 4      | 0.0 - 14.3              | Nanosheet (15.2 nm) | This study (Si-NS15.2)                   |
| 54(5)      | 14(2)  | 0.0 - 14.3              | Nanosheet (15.2 nm) | This study (Si-NS15.2)                   |

### Supplementary References

1. Wyckoff, R. W. G. Crystal structures: second edition. *John Wiley* **1**, 7-83 (1963).
2. Scherrer, P. Bestimmung der grosse und der inneren struktur von kolloidteilchen mittels Rontgenstrahlen. *Göttinger Nachrichten Gesell.* **2**, 98 (1918).
3. McMahon, M. I. & Nelmess, R. J. New high-pressure phase of Si. *Phys. Rev. B* **47**, 8337-8340 (1993).
4. Vaidya, S. N. & Kennedy, G. C. Compressibility of 22 elemental solids to 45 kbar. *J. Phys. Chem. Solids* **33**, 1377-1389 (1972).
5. George, A. Properties of Crystalline Silicon: Elastic constants and moduli of diamond cubic Si. *An INSPEC publication* **20**, 98-103 (1997).
6. Yin, M. T. & Cohen, M. L. Theory of static structural properties, crystal stability, and phase transformations: Application to Si and Ge. *Phys. Rev. B* **26**, 5668-5687 (1982).
7. Pandya, T. C., Thakar, N. A. & Bhatt, A. D. Analysis of equations of state and temperature dependence of thermal expansivity and bulk modulus for silicon. *J. Phys. Conf. Ser.* **377**, 012097 (2012).
